# Supplementary material
Source: Springer Nature journal article supplement (https://www.springermedizin.de/resource/supplementary/12891_2009_655_MOESM1_ESM.pdf/9506486)
Supplement: MOESM1 [file 9506486]

**Additional File 1** Cohort characteristics, TSP data source, hierarchy of evidence score and quality appraisal for each study.

| Reference               | Population                 | TSP data source           | N              | Age (yrs)  | NHMRC score | Quality appraisal score* |   |   |   |   |   |   |   |   |    |    |    |    |    |    | Total |
|-------------------------|----------------------------|---------------------------|----------------|------------|-------------|--------------------------|---|---|---|---|---|---|---|---|----|----|----|----|----|----|-------|
|                         |                            |                           |                |            |             | 1                        | 2 | 3 | 4 | 5 | 6 | 7 | 8 | 9 | 10 | 11 | 12 | 13 | 14 | 15 |       |
| Aronsson et al [39]     | Swedish working adults     | telephone interview       | 2086 F, 1715 M | 16-65      | IV          | 1                        | 1 | 1 | 1 | 0 | 1 | 0 | 1 | 1 | 1  | 1  | 1  | 1  | 1  | 0  | 12    |
| Balague et al [60]      | Swiss schoolchildren       | self-report questionnaire | 875 F, 840 M   | 7-17       | IV          | 1                        | 1 | 1 | 1 | 0 | 0 | 0 | 0 | 0 | 1  | 1  | 1  | 1  | 0  | 0  | 9     |
| Balague et al [61]      | Swiss schoolchildren       | self-report questionnaire | 323 F, 292 M   | 12-17      | IV          | 1                        | 0 | 1 | 0 | 0 | 0 | 0 | 1 | 1 | 1  | 1  | 1  | 1  | 1  | 1  | 10    |
| Balague et al [59]      | Swiss schoolchildren       | self-report questionnaire | 54 F, 63 M     | 10-16      | IV          | 1                        | 0 | 1 | 0 | 0 | 1 | 1 | 0 | 1 | 1  | 1  | 1  | 1  | 1  | 0  | 10    |
| Cude-Mauroux et al [40] | Swiss schoolchildren       | self-report questionnaire | 68 F, 57 M     | 8-12       | IV          | 1                        | 1 | 1 | 1 | 1 | 1 | 1 | 0 | 1 | 1  | 1  | 1  | 1  | 1  | 1  | 14    |
| Dieck et al [62]        | American college graduates | self-report questionnaire | 903 F          | Not stated | III-2       | 1                        | 0 | 1 | 0 | 0 | 0 | 0 | 0 | 1 | 1  | 1  | 1  | 1  | 1  | 1  | 9     |
| EI-Metwally et al [41]  | Finnish schoolchildren     | self-report questionnaire | 571 F, 542 M   | 10.8       | II          | 1                        | 1 | 1 | 1 | 0 | 1 | 0 | 1 | 1 | 1  | 1  | 1  | 1  | 1  | 1  | 13    |
| Fairbank et al [42]     | UK schoolchildren          | self-report questionnaire | 219 F, 227 M   | 12-18      | IV          | 0                        | 0 | 1 | 0 | 0 | 0 | 0 | 0 | 0 | 1  | 0  | 1  | 0  | 1  | 0  | 4     |

and subjective

interview

|                       |                               |                           |                |            |    |   |   |   |   |   |   |   |   |   |   |   |   |   |   |   |    |
|-----------------------|-------------------------------|---------------------------|----------------|------------|----|---|---|---|---|---|---|---|---|---|---|---|---|---|---|---|----|
| Feldman et al [69]    | Canadian high school students | self-report questionnaire | 342            | 13.8 (0.1) | II | 1 | 1 | 1 | 0 | 0 | 1 | 1 | 0 | 0 | 1 | 1 | 1 | 1 | 1 | 1 | 11 |
| Grimmer et al [12]    | Australian schoolchildren     | subjective interview      | 60 F, 72 M     | 13-17      | II | 1 | 1 | 1 | 1 | 0 | 1 | 1 | 0 | 0 | 1 | 1 | 1 | 1 | 1 | 1 | 12 |
| Hagen et al [43]      | Norwegian adults              | self-report questionnaire | 25,922         | 20-80      | IV | 1 | 1 | 1 | 0 | 0 | 1 | 0 | 0 | 0 | 1 | 1 | 1 | 1 | 1 | 1 | 10 |
| Harreby et al [64]    | Danish schoolchildren         | self-report questionnaire | 718 F, 671 B   | 14-15      | IV | 1 | 0 | 1 | 0 | 0 | 0 | 0 | 0 | 0 | 1 | 1 | 1 | 1 | 1 | 0 | 7  |
| Korovessis et al [44] | Greek schoolchildren          | subjective interview      | 664 F, 588 M   | 15.0 (2.0) | IV | 1 | 0 | 1 | 0 | 0 | 1 | 1 | 0 | 1 | 1 | 1 | 1 | 1 | 1 | 0 | 10 |
| Korovessis et al [65] | Greek schoolchildren          | subjective interview      | 1816 F, 1625 M | 12.0 (1.5) | IV | 1 | 0 | 1 | 0 | 0 | 1 | 1 | 0 | 1 | 1 | 1 | 1 | 1 | 1 | 1 | 11 |
| Kujala et al [45]     | Finnish schoolchildren        | self-report questionnaire | 344 F, 354 M   | 10-16      | IV | 1 | 0 | 1 | 0 | 0 | 1 | 0 | 1 | 0 | 1 | 1 | 1 | 1 | 1 | 0 | 9  |
| Linton et al [47]     | Swedish adults                | self-report questionnaire | 1004 F, 910 M  | 35-45      | IV | 1 | 1 | 1 | 1 | 0 | 0 | 0 | 0 | 0 | 0 | 1 | 1 | 1 | 1 | 0 | 8  |
| Linton et al [46]     | Swedish adults                | self-report questionnaire | 500            | 35-45      | IV | 1 | 1 | 1 | 0 | 0 | 1 | 0 | 0 | 1 | 1 | 1 | 1 | 1 | 1 | 0 | 10 |
| Mikkelsen et al [66]  | Finnish schoolchildren        | self-report questionnaire | 894 F, 862 M   | 9.8 (0.3)  | II | 1 | 1 | 1 | 1 | 0 | 1 | 0 | 1 | 1 | 1 | 1 | 1 | 1 | 1 | 1 | 13 |

and

|                        |                              |                           |                |            |       |   |   |   |   |   |   |   |   |   |   |   |   |   |   |   |    |
|------------------------|------------------------------|---------------------------|----------------|------------|-------|---|---|---|---|---|---|---|---|---|---|---|---|---|---|---|----|
|                        |                              |                           |                | 11.8       |       |   |   |   |   |   |   |   |   |   |   |   |   |   |   |   |    |
|                        |                              |                           |                | (0.4)      |       |   |   |   |   |   |   |   |   |   |   |   |   |   |   |   |    |
| Mogensen et al [67]    | Danish schoolchildren        | subjective interview      | 234 F, 205 M   | 12-13      | IV    | 1 | 1 | 1 | 1 | 0 | 1 | 1 | 1 | 0 | 1 | 1 | 1 | 1 | 1 | 1 | 13 |
| Moore et al [48]       | American schoolchildren      | subjective interview      | 287 F, 244 M   | 8-18       | IV    | 1 | 1 | 1 | 0 | 0 | 1 | 1 | 0 | 0 | 1 | 1 | 1 | 1 | 1 | 1 | 11 |
| Murphy et al [49]      | UK schoolchildren            | self-report questionnaire | 32 F, 34 F     | 12.7 (0.9) | IV    | 1 | 1 | 1 | 0 | 0 | 1 | 1 | 0 | 0 | 1 | 1 | 1 | 1 | 1 | 1 | 11 |
| Murphy et al [50]      | UK schoolchildren            | self-report questionnaire | 336 F, 343 M   | 12.8 (0.9) | IV    | 1 | 1 | 1 | 0 | 0 | 1 | 1 | 1 | 1 | 1 | 1 | 1 | 1 | 1 | 1 | 13 |
| Natvig et al [68]      | Norwegian adults             | self-report questionnaire | 1418 F, 1308 M | 20-72      | IV    | 1 | 1 | 1 | 0 | 0 | 1 | 0 | 1 | 1 | 0 | 1 | 0 | 1 | 1 | 1 | 10 |
| Niemelainen et al [13] | Finnish males                | structured interview      | 600 M          | 49.8 (7.7) | IV    | 1 | 1 | 1 | 0 | 0 | 1 | 1 | 0 | 1 | 1 | 1 | 1 | 1 | 1 | 1 | 12 |
| Park et al [51]        | American working male adults | self-report questionnaire | 12,812         | >19 yrs    | III-2 | 1 | 1 | 1 | 1 | 0 | 1 | 1 | 0 | 0 | 1 | 0 | 1 | 1 | 0 | 1 | 10 |
| Reigo et al [52]       | Swedish working adults       | self-report questionnaire | 663 F, 681 M   | 20-59      | IV    | 1 | 0 | 1 | 0 | 0 | 1 | 0 | 1 | 1 | 1 | 0 | 1 | 1 | 1 | 0 | 9  |
| Salminen et al [53]    | Finnish schoolchildren       | self-report questionnaire | 370            | 11-17      | IV    | 1 | 1 | 1 | 0 | 0 | 1 | 0 | 1 | 0 | 1 | 1 | 1 | 1 | 1 | 1 | 11 |
| Troussier et al [54]   | French schoolchildren        | self-report questionnaire | 471 F, 455 M   | 10-14      | IV    | 1 | 0 | 1 | 0 | 0 | 1 | 0 | 0 | 0 | 1 | 1 | 1 | 1 | 1 | 1 | 9  |
| Tsuritani et al        | Japanese                     | subjective                | 709 F          | 54.0       | IV    | 1 | 1 | 1 | 1 | 0 | 1 | 0 | 0 | 0 | 1 | 1 | 1 | 1 | 1 | 0 | 10 |

|                                                      |                              |                           |                          |                           |    |      |      |     |      |     |      |      |      |      |      |      |      |      |      |      |                              |    |
|------------------------------------------------------|------------------------------|---------------------------|--------------------------|---------------------------|----|------|------|-----|------|-----|------|------|------|------|------|------|------|------|------|------|------------------------------|----|
| al [55]                                              | female adults                | interview                 |                          | (7.7)                     |    |      |      |     |      |     |      |      |      |      |      |      |      |      |      |      |                              |    |
| Veerapen et al [56]                                  | Adults living in Malaysia    | subjective interview      | 1420 F, 1174 M           | > 15                      | IV | 1    | 0    | 1   | 0    | 0   | 1    | 0    | 0    | 0    | 1    | 1    | 1    | 1    | 1    | 1    | 1                            | 9  |
| Wedderkopp et al [57]                                | Danish female schoolchildren | subjective interview      | 254 F, 165 F adolescents | 8-10, 14-16               | IV | 1    | 1    | 1   | 1    | 0   | 1    | 0    | 0    | 0    | 1    | 1    | 1    | 1    | 1    | 1    | 1                            | 12 |
| Wedderkopp et al [11]                                | Danish schoolchildren        | subjective interview      | 419 F, 387 M             | 8-16                      | IV | 1    | 0    | 1   | 0    | 1   | 1    | 1    | 1    | 0    | 1    | 1    | 1    | 1    | 1    | 1    | 1                            | 12 |
| Whittfield et al [58]                                | New Zealand schoolchildren   | Self-report questionnaire | 70 F, 70 M               | 13.6 (1.3) and 17.1 (0.6) | IV | 1    | 1    | 1   | 0    | 0   | 1    | 1    | 0    | 0    | 1    | 1    | 1    | 1    | 1    | 1    | 1                            | 11 |
| <i>Proportion of studies with positive score (%)</i> | -                            | -                         | -                        | -                         | -  | 97.0 | 63.6 | 100 | 33.3 | 6.1 | 81.8 | 42.4 | 33.9 | 42.4 | 93.9 | 90.9 | 97.0 | 97.0 | 93.9 | 66.7 | <i>Mean (SD): 10.5 (2.0)</i> |    |

\* Key to scoring (Law et al. [36]): all items 1 for yes, 0 for no except biases (0 for yes, 1 for no).

1 = Was the study purpose stated clearly? 2 = Was relevant background literature reviewed? 3 = Was the design appropriate for the study question? 4 = Were there any biases present (minimum response rate of 80% for sample bias, blinding of investigators when physical measure were taken)? 5 = Was sample size justified? 6 = Was the sample described in detail? (had to include the number of participants by gender, age,

and a description of where the cohort was sampled from) 7 = Was informed consent obtained? (if not described, assume no); 8 = Were the outcome measures valid? (if all not described, assume no); 9 = Were the outcome measures reliable? (if all not described, assume no); 10 = Results were reported in terms of statistical significance? 11 = Clinical importance was reported? 12 = Were the statistical analysis methods appropriate? 13 = Conclusions were appropriate given the study methods? 14 = Are there implications for clinical practice given the results of the study (based on the experience of the reviewers)? 15 = Were limitations of the study acknowledged and described by the authors?

M = males, F = females
